# Supplementary material for: Overexpression of Tamarix hispida ThTrx5 Confers Salt Tolerance to Arabidopsis by Activating Stress Response Signals
Source: MDPI journal article supplement (doi:10.3390/ijms21031165), 2020-02-10
Supplement: s1 [file s1]

Supplementary data

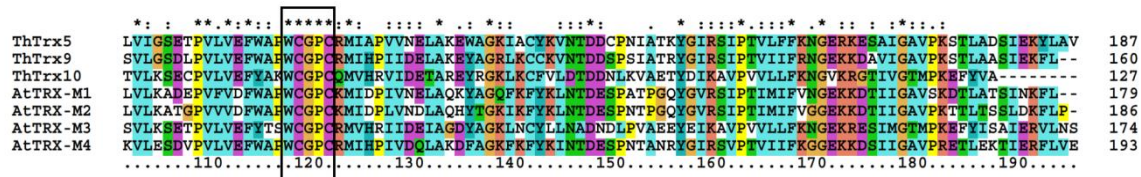

**Supplementary Figure S1.** Multiple Sequence Alignment of ThTrx Proteins of family I m Subclasses in Tamarix and Arabidopsis. The box highlights the WCGPC domains.

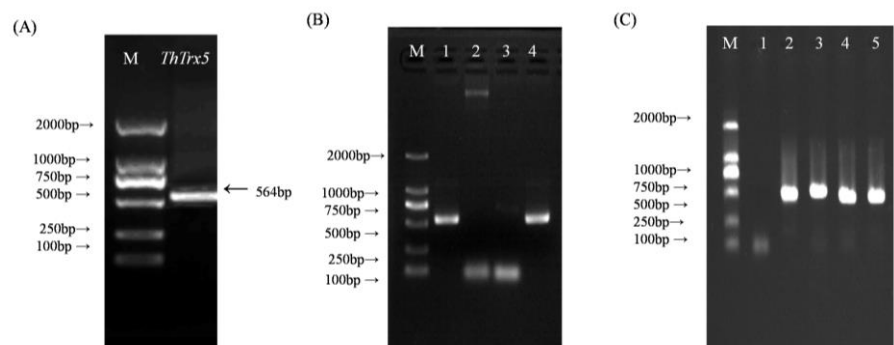

**Supplementary Figure S2:** *ThTrx5* gene cloning and plant expression vector construction process. (A) PCR amplified fragment of *ThTrx5* gene; (B) PCR detection of *ThTrx5* gene topo reaction M. DL2000 Marker; 1: Positive control; 2: Negative control; 3: Water control; 4: bacterial solution PCR; (C) PCR detection of *ThTrx5* gene LR reaction M: DL2000 Marker; 1: Water control; 2: Positive control; 3-5: bacterial solution PCR.

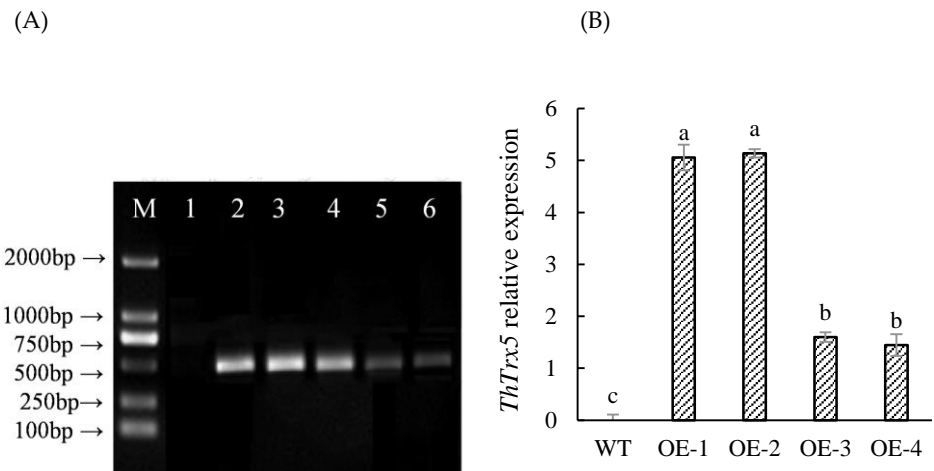

**Supplementary Figure S3** Molecular Detection of Transgenic *Arabidopsis* T3 Plants (A) M: DNA Maker DL2000; 1: water control; 2: positive control; 3-6: transgenic lines; (B) *ThTrx5* relative expression detection.

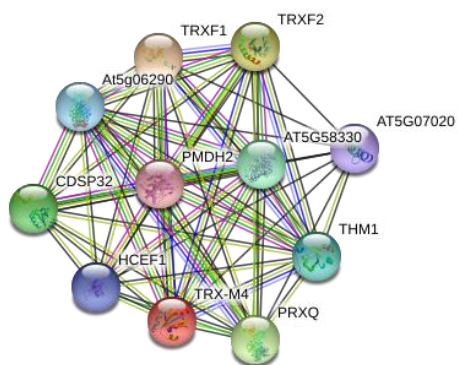

**Supplementary Figure 4.** Schematic diagram of predicted AtTHM4 interacting proteins.
